# Supplementary material for: Targeting Non-classical Myelin Epitopes to Treat Experimental Autoimmune Encephalomyelitis
Source: PubMed Central journal article supplement (PMC5086895; doi:10.1038/srep36064), 2016-10-31
Supplement: srep36064-s1.pdf [file srep36064-s1.pdf]

1 **+SUPPLEMENTAL INFORMATION**

2 **Targeting Non-classical Myelin Epitopes to Treat Experimental Autoimmune**  
3 **Encephalomyelitis**

4 Xiaohua Wang<sup>1,4</sup>, Jintao Zhang<sup>1,7</sup>, David J. Baylink<sup>1</sup>, Chih-Huang Li<sup>1,5,6</sup>, Douglas M. Watts<sup>2</sup>, Yi  
5 Xu<sup>1</sup>, Xuezhong Qin<sup>1,3</sup>, Michael H. Walter<sup>1</sup>, Xiaolei Tang<sup>1\*</sup>

6  
7 <sup>1</sup>Department of Medicine, Division of Regenerative Medicine, Loma Linda University, Loma  
8 Linda, California, USA; <sup>2</sup>Department of Biological Sciences, University of Texas at El Paso, El  
9 Paso, TX, USA; <sup>3</sup>Musculoskeletal Disease Center, Jerry L. Pettis Memorial Veterans Affairs  
10 Medical Center, Loma Linda, California, USA. <sup>4</sup>Jinan Infectious Disease Hospital, Shandong  
11 University, Shandong, China; <sup>5</sup>Department of Emergency Medicine, Chang-Gung Memorial  
12 Hospital, Linkou Medical Center, Taoyuan, Taiwan; <sup>6</sup>Graduate Institute of Clinical Medical  
13 Sciences, School of Medicine, Chang-Gung university, Taoyuan, Taiwan. <sup>7</sup>Institute of Medicine,  
14 University of Zhengzhou, Henan, China.

15  
16 \*Correspondence should be addressed to Xiaolei Tang, [xitang@llu.edu](mailto:xitang@llu.edu).

17  
18 **Correspondence:**

19 Xiaolei Tang, MD/PhD,  
20 Department of Medicine,  
21 Division of Regenerative Medicine,  
22 Loma Linda University,  
23 Loma Linda, CA. 92354.  
24 Phone: (909) 651-5891;  
25 Fax: (909) 558-0428.  
26 Email: Xitang@llu.edu.

**Figure S1.**

```
m LVALIICYNWLHRRLAGQFL
r LVALIICYNWLHRRLAGQFL
C Jacchus LVALIICYNWLHRRLAGQFL
h LVALIICYNWLHRRLAGQFL
```

27

28 **Figure S1. MOG<sub>196</sub> sequence is conserved across species.** The data show an alignment of the  
29 sequences surrounding MOG<sub>196</sub> in four different species. “m”: mice; “r”: rats; “C Jacchus”:  
30 Callithrix jacchus; “h”: humans.

31

32

Figure S2

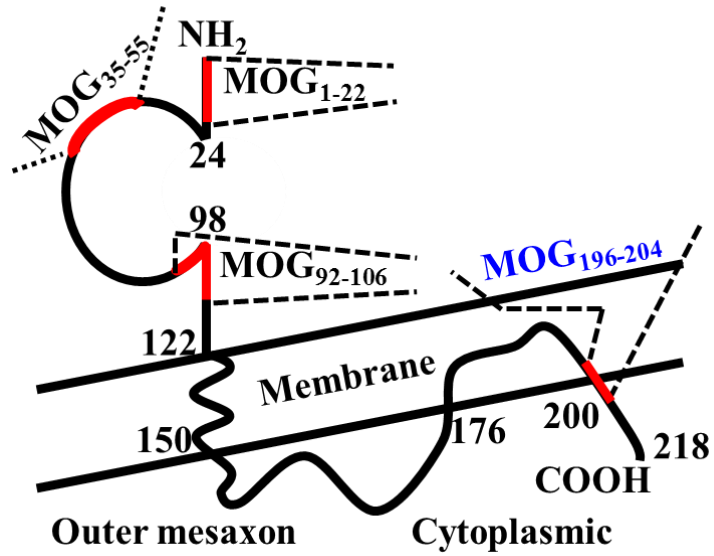

33

34 **Figure S2.** MOG<sub>196</sub> sequence is located in the intracellular domain of myelin  
35 **oligodendrocyte glycoprotein (MOG).** The three highlighted extracellular epitopes, i.e. MOG<sub>35-</sub>  
36 <sub>55</sub>, MOG<sub>1-22</sub>, and MOG<sub>92-106</sub>, are encephalitogenic (or pathogenic) epitopes. The intracellular  
37 MOG<sub>196</sub> epitope is a regulatory (or protective) Qa-1<sup>b</sup> epitope.

38

Figure S3

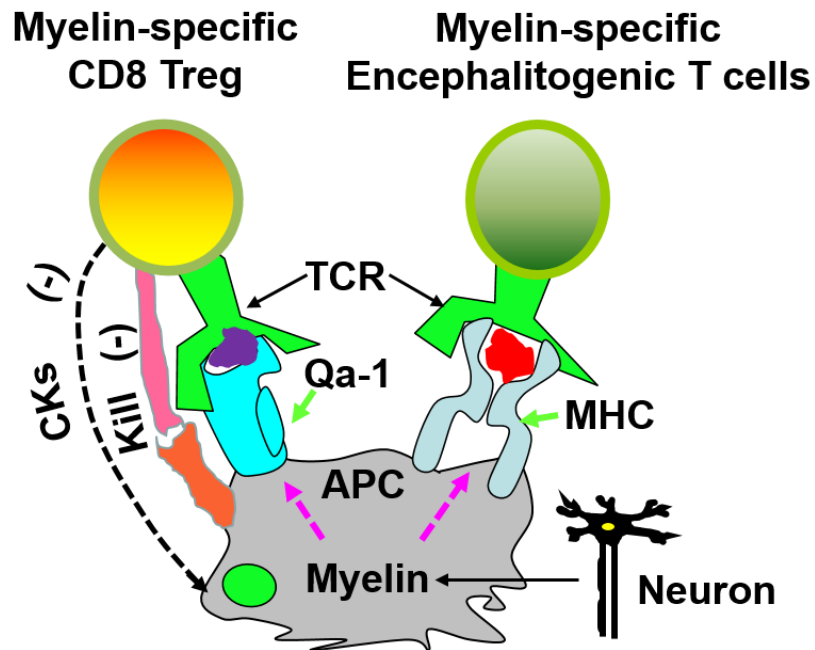

39  
40

41 **Figure S3. A model of immune regulation mediated by myelin-specific, Qa-1-restricted**  
42 **CD8 Treg.** Myelin-specific, Qa-1-restricted CD8 Treg cells can recognize and tolerize/eliminate  
43 antigen-presenting cells (APCs) that otherwise activate myelin-specific encephalitogenic T cells  
44 in the CNS and/or peripheral lymphoid tissues. Tolerization/elimination of APCs, which present  
45 myelin epitopes, is mediated by regulatory cytokines (CKs), inhibitory molecules, or direct  
46 cytotoxicity. Consequently, activation of myelin-specific encephalitogenic T cells and  
47 autoimmune attacks of myelin sheath are thwarted.

48  
49

50  
51  
52  
53

**Table S1. Immunization with MOG<sub>196</sub>-pulsed K<sup>b-/-</sup>D<sup>b-/-</sup> DCs suppressed MOG<sub>35-55</sub>-induced experimental autoimmune encephalomyelitis**

| Treatments                         | # of animals with disease/# of total animals (peak scores of individual animals) | Mean days of disease onset | Mean maximal disease score |
|------------------------------------|----------------------------------------------------------------------------------|----------------------------|----------------------------|
| No Tx <sup>1</sup>                 | 5/5 (4, 5, 4, 5, 4)                                                              | 10.8 ± 0.8                 | 4.4 ± 0.5                  |
| DC/Qdm <sup>2</sup>                | 4/5 (5, 5, 4, 0, 3)                                                              | 11.0 ± 0.8                 | 3.4 ± 2.1                  |
| DC/MOG <sub>196</sub> <sup>3</sup> | 1/5 (0, 0, 0, 0, 3)                                                              | 11 ± 0.0                   | 0.6 ± 1.3                  |

54 <sup>1</sup>No treatment.  
55 <sup>2</sup>Qdm-pulsed K<sup>b-/-</sup>D<sup>b-/-</sup> DCs.  
56 <sup>3</sup>MOG<sub>196</sub>-pulsed K<sup>b-/-</sup>D<sup>b-/-</sup> DCs.

57  
58  
59  
60  
61

**Table S2. Immunization with MOG<sub>196</sub>-pulsed C57BL/6 DCs suppressed MOG<sub>35-55</sub>-induced experimental autoimmune encephalomyelitis**

| Treatments                             | # of animals with disease/# of total animals (peak scores of individual animals) | Mean days of disease onset | Mean maximal disease score |
|----------------------------------------|----------------------------------------------------------------------------------|----------------------------|----------------------------|
| DCs/HSP60 <sub>p216</sub> <sup>1</sup> | 5/5 (5, 5, 3.5, 2.5, 2)                                                          | 14.2 ± 1.0                 | 3.1 ± 0.3                  |
| DCs/Qdm <sup>2</sup>                   | 5/5 (3.5, 3.5, 3.5, 2.5, 2)                                                      | 15 ± 1.1                   | 3.2 ± 0.3                  |
| DCs/MOG <sub>196</sub> <sup>3</sup>    | 3/5 (2.5, 2.5, 1.5, 0, 0)                                                        | 16.7 ± 0.3                 | 1.3 ± 0.6                  |

62 <sup>1</sup>HSP60<sub>p216</sub>-pulsed C57BL/6 DCs.  
63 <sup>2</sup>Qdm-pulsed C57BL/6 DCs.  
64 <sup>3</sup>MOG<sub>196</sub>-pulsed C57BL/6 DCs.

65  
66  
67  
68

69  
70  
71  
72**Table S3. Suppression of ongoing MOG<sub>35-55</sub>-induced experimental autoimmune encephalomyelitis by MOG<sub>196</sub> immunization was dependent on CD8<sup>+</sup> T cells**

| Treatments                                | # of animals with disease/# of total animals (peak scores of individual animals) | Mean days of disease onset | Mean maximal disease score |
|-------------------------------------------|----------------------------------------------------------------------------------|----------------------------|----------------------------|
| No Tx <sup>1</sup>                        | 5/5 (3.5, 4, 4, 4, 3)                                                            | 8.4 ± 0.9                  | 3.7 ± 0.4                  |
| DCs/ MOG <sub>196</sub> <sup>2</sup>      | 5/5 (3, 1.5, 3, 0.5, 0.5)                                                        | 8 ± 0                      | 1.7 ± 1.3                  |
| DCs/MOG <sub>196</sub> + mAb <sup>3</sup> | 4/5 (3, 5, 3, 3) <sup>4</sup>                                                    | 8.3 ± 0.5                  | 3.5 ± 1                    |

73  
74<sup>1</sup> No Treatment.<sup>2</sup> MOG<sub>196</sub>-pulsed C57BL/6 DCs.<sup>3</sup> MOG<sub>196</sub>-pulsed C57BL/6 DCs + anti-CD8 mAb.<sup>4</sup> One animal that died before treatment was excluded from this analysis.
